# Supplementary material for: Effects of cannabinoids on the development of chick embryos in ovo
Source: PubMed Central journal article supplement (PMC6748917; doi:10.1038/s41598-019-50004-7), 2019-09-17
Supplement: 41598_2019_50004_MOESM1_ESM.pdf [file 41598_2019_50004_MOESM1_ESM.pdf]

*Supplementary information*

# **Effects of cannabinoids on the development of chick embryos *in ovo***

**Sofia B. Gustafsson<sup>1</sup>, and Stig O. P. Jacobsson<sup>1,\*</sup>**

<sup>1</sup>Department of Pharmacology and Clinical Neuroscience, Umeå University, SE-901 87 Umeå, Sweden

\* [stig.jacobsson@umu.se](mailto:stig.jacobsson@umu.se)

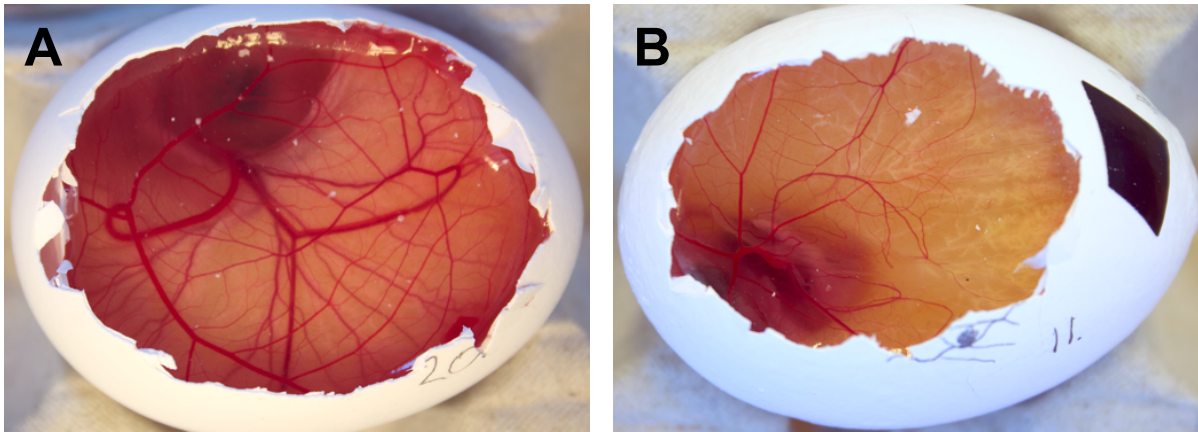

**Supplementary Figure S1. Representative photographs of the vascularization in fertilized chicken eggs after 10 days of incubation.** The eggs were repeatedly injected *in ovo* (after 1, 4 and 7 days) with (A) saline or (B) 20  $\mu$ M CBD. After 10 days of incubation, the eggs were cracked and the amount of blood vessels and capillaries of the yolk sac and the chorioallantoic membrane was scored 0-2 (0 = no vascularization, 1 = small blood vessels with fewer capillaries, and 2 = normal large blood vessels with extensive capillary network evenly distributed). The vascularization in panel A is scored 2 and in panel B scored 1.
